# Supplementary material for: Modeling Patterns in Map Use Contexts and Mobile Map Design Usability
Source: MDPI journal article supplement (doi:10.3390/ijgi10080527), 2021-08-06
Supplement: s1 [file s1]

## Supplementary Materials

**Table S1.** Map-reading tasks with respective question.

| #  | Map-Reading Task:                  | Question:                                                                                                       | Map Design Elements:          |
|----|------------------------------------|-----------------------------------------------------------------------------------------------------------------|-------------------------------|
| 1  | T1: Identify location              | Can you identify the Universidad de Valle on the map? Please tap on the map.                                    | Static Landmark map           |
| 2  |                                    | Which of the malls on the map is the closest to the University del Valle? Please tap on the map.                | Restricted Landmark map       |
| 3  |                                    | Which of the malls is furthest away from the University del Valle? Please tap on the map.                       | Non-restricted Landmark map   |
| 4  |                                    | Can you identify the Exito in San Flora on the map? Please tap on the map.                                      | Static Simple map             |
| 5  |                                    | Which of the parks is closest to Palmetto Mall? Please tap on the map.                                          | Restricted Simple map         |
| 6  |                                    | Which of the malls on the map is the furthest away from the Zoo? Please tap on the map.                         | Non-restricted Simple map     |
| 7  |                                    | Can you identify the Estadio Pascual Guerrero on the map? Please tap on the map.                                | Static Mapbox Streets         |
| 8  |                                    | Which is the closest park to your location? Please tap on the map.                                              | Restricted Mapbox Streets     |
| 9  |                                    | Which is the closest supermarket to your location? Please tap on the map.                                       | Non-restricted Mapbox Streets |
| 10 | T2: Select a single point feature  | Can you identify the Estadio Pascual Guerrero on the map? Please select.                                        | Static Landmark map           |
| 11 |                                    | Can you identify the park on the map that is furthest away from the Cosmocentro mall? Please select.            | Restricted Landmark map       |
| 12 |                                    | Which of the following areas is closest to you: Coliseo El Pueblo or Parque El Ingenio? Please select.          | Non-restricted Landmark map   |
| 13 |                                    | Can you identify the Universidad de Valle on the map? Please select.                                            | Static Simple map             |
| 14 |                                    | Which of the malls on the map is the closest to your location? Please select.                                   | Restricted Simple map         |
| 15 |                                    | Which of the malls on the map is the furthest away from your location? Please select.                           | Non-restricted Simple map     |
| 16 |                                    | Can you identify the Parque El Ingenio on the map? Please select.                                               | Static Mapbox Streets         |
| 17 |                                    | Which of the following mall is closest to you: Centenario or Unicentro? Please select.                          | Restricted Mapbox Streets     |
| 18 |                                    | Which of the following parks is furthest away from you: Parque San Antonio or Parque El Ingenio? Please select. | Non-restricted Mapbox Streets |
| 19 | T3: Select multiple point features | Can you identify both the Zoologico and Parque San Antonio? Please select.                                      | Static Landmark map           |
| 20 |                                    | Which two of the malls are closest to University ICESI? Please select.                                          | Restricted Landmark map       |
| 21 |                                    | Can you identify all parks on the map? Please select.                                                           | Non-restricted Landmark map   |
| 22 |                                    | Can you identify the mall Chipchape and Pasarela? Please select.                                                | Static Simple map             |
| 23 |                                    | Which two parks are closest to you? Please select.                                                              | Restricted Simple map         |
| 24 |                                    | Which two malls are closest to you? Please select.                                                              | Non-restricted Simple map     |
| 25 |                                    | Can you identify the University Pontificia Javeriana and ICESI? Please select.                                  | Static Mapbox Streets         |
| 26 |                                    | Can you identify the malls Jardin Plaza and Chipchape? Please select.                                           | Restricted Mapbox Streets     |
| 27 |                                    | Can you identify the Zoologico and the Coliseo El Pueblo? Please select.                                        | Non-restricted Mapbox Streets |

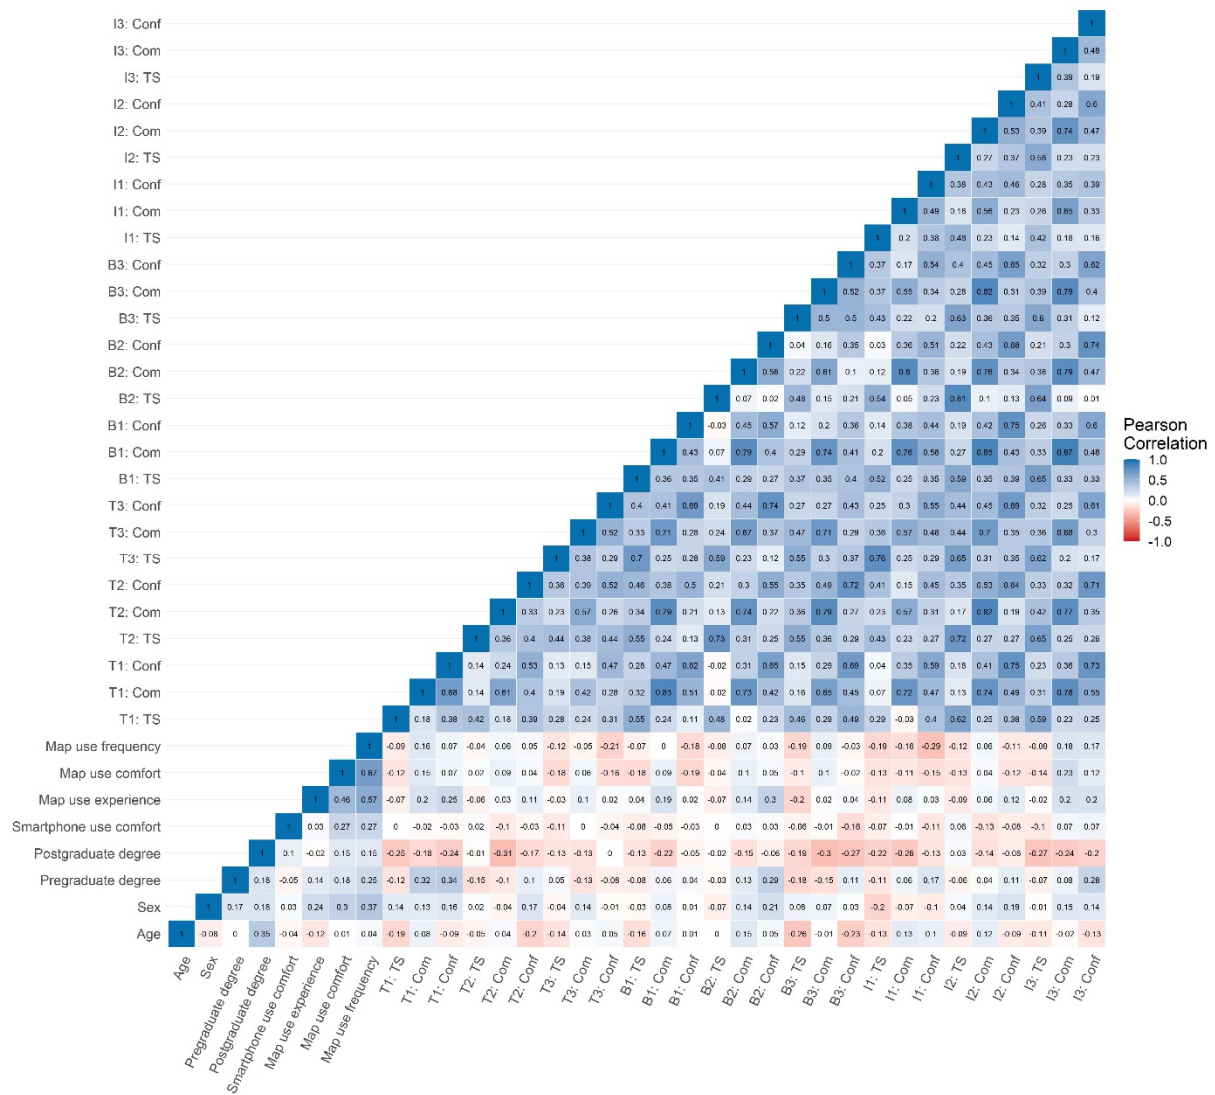

**Figure S1.** Correlation matrix of participant characteristics and usability metrics (with TS = task success; Com = comfort ratings; Conf = confidence ratings) of map design variations.

**Table S2.** Residuals of data points of Archetypal Analysis (with P id = participant id; TS = task success; Com = comfort ratings; Conf = confidence ratings).

| P<br>Id | T1: Identify Location |       |       | T2: Select Point<br>Feature |       |       | T3: Select Multiple<br>Point Features |       |       | Landmark Map |       |       | Simple Map |       |       | Mapbox Streets |       |       | Static Map |       |       | Restricted Map |       |       | Non-Restricted<br>Map |       |       |
|---------|-----------------------|-------|-------|-----------------------------|-------|-------|---------------------------------------|-------|-------|--------------|-------|-------|------------|-------|-------|----------------|-------|-------|------------|-------|-------|----------------|-------|-------|-----------------------|-------|-------|
|         | TS                    | Com   | Conf  | TS                          | Com   | Conf  | TS                                    | Com   | Conf  | TS           | Com   | Conf  | TS         | Com   | Conf  | TS             | Com   | Conf  | TS         | Com   | Conf  | TS             | Com   | Conf  | TS                    | Com   | Conf  |
| 1       | 0.30                  | -0.25 | 0.67  | 0.83                        | -0.05 | -0.32 | -0.76                                 | -0.12 | 0.37  | -1.48        | -0.13 | 0.45  | 0.22       | -0.17 | -0.35 | 0.87           | -0.13 | 0.19  | -0.29      | -0.13 | -0.12 | 0.02           | -0.11 | 0.70  | 0.16                  | -0.19 | -0.37 |
| 2       | 1.62                  | -0.57 | 1.46  | -0.37                       | -0.22 | 0.03  | -0.49                                 | -0.35 | -0.12 | -0.57        | -0.43 | -1.03 | -0.40      | -0.48 | 1.46  | 0.46           | -0.30 | 0.18  | -0.11      | -0.36 | -0.39 | 0.13           | -0.41 | -0.29 | -0.54                 | -0.45 | 0.81  |
| 3       | -0.06                 | -0.09 | -0.18 | -0.12                       | 0.00  | -0.15 | -0.15                                 | -0.07 | 0.53  | -0.14        | -0.05 | -0.27 | -0.14      | -0.14 | 0.49  | -0.02          | 0.00  | -0.02 | -0.03      | -0.09 | -0.05 | -0.16          | -0.03 | -0.23 | -0.14                 | -0.09 | 0.30  |
| 4       | 1.51                  | -0.50 | 0.49  | -0.28                       | -0.26 | 0.18  | -0.41                                 | -0.26 | 0.30  | -0.50        | -0.40 | -0.63 | -0.38      | -0.30 | 1.10  | 0.37           | -0.36 | 0.09  | -0.09      | -0.23 | 0.96  | 0.15           | -0.41 | -0.63 | -0.48                 | -0.41 | 0.53  |
| 5       | 0.00                  | -0.01 | -0.02 | 0.00                        | 0.00  | -0.03 | -0.02                                 | -0.01 | 0.00  | 0.00         | 0.00  | 0.00  | -0.02      | -0.02 | -0.04 | 0.00           | 0.00  | -0.02 | 0.00       | 0.00  | 0.00  | -0.03          | 0.00  | 0.00  | 0.00                  | -0.04 | -0.08 |
| 6       | -0.30                 | -0.02 | -0.06 | -0.20                       | 0.00  | -0.05 | 0.46                                  | -0.01 | -0.02 | 0.73         | 0.00  | -0.02 | -0.36      | -0.02 | -0.04 | -0.19          | -0.01 | -0.07 | -0.05      | 0.00  | 0.00  | 0.34           | 0.00  | -0.05 | -0.29                 | -0.04 | -0.08 |
| 7       | 1.05                  | 0.33  | 0.05  | 0.22                        | -0.26 | 0.35  | 0.07                                  | -0.39 | -0.42 | 2.13         | -0.32 | -0.41 | -1.03      | -0.16 | -0.23 | 0.88           | 0.04  | 0.16  | -0.71      | -0.17 | -0.36 | 0.47           | -0.41 | 0.01  | 0.21                  | 0.23  | 0.05  |
| 8       | 0.96                  | 0.24  | 0.06  | -0.02                       | 1.13  | -0.33 | -0.60                                 | -0.68 | -0.26 | 0.88         | 0.20  | -0.38 | 0.01       | 0.35  | 0.44  | -0.66          | -0.05 | -0.48 | -0.39      | -0.70 | -0.25 | -0.68          | -0.15 | -0.48 | 0.27                  | 0.61  | 0.09  |
| 9       | 0.47                  | 0.19  | 0.55  | 1.64                        | 0.61  | 0.08  | -1.14                                 | 0.03  | 0.03  | -0.54        | 0.79  | -2.14 | 0.57       | 0.21  | 0.57  | 0.29           | 0.30  | 0.87  | 0.09       | 0.33  | 1.20  | 0.24           | -0.62 | -0.45 | -0.05                 | 0.84  | 0.52  |
| 10      | 0.60                  | -0.27 | 0.58  | 1.35                        | -0.02 | -0.39 | -1.36                                 | -0.17 | -0.02 | 0.57         | -0.14 | -0.71 | -0.55      | -0.29 | 0.69  | 0.23           | -0.07 | 0.22  | -0.27      | -0.21 | -0.13 | -0.43          | -0.10 | 0.54  | 0.02                  | -0.21 | -0.07 |
| 11      | -0.27                 | 0.35  | 0.05  | -0.23                       | -0.12 | 0.66  | -0.32                                 | -0.22 | -0.59 | -0.35        | -0.25 | 1.17  | -0.26      | 0.42  | 0.05  | -0.11          | -0.16 | -0.21 | -0.07      | -0.22 | -0.23 | -0.36          | 0.43  | 0.06  | -0.33                 | -0.28 | -0.14 |
| 12      | -0.36                 | 0.00  | 0.05  | -0.34                       | -0.15 | 0.51  | 0.46                                  | -0.30 | -0.84 | -0.50        | -0.34 | -0.93 | 0.39       | 0.44  | 0.72  | -0.15          | -0.21 | 0.40  | -0.09      | -0.32 | -0.31 | 0.38           | -0.31 | -0.84 | -0.47                 | 0.82  | 2.10  |
| 13      | 0.68                  | 0.31  | -0.12 | -0.32                       | -1.25 | 0.42  | -0.70                                 | 0.86  | -1.16 | -0.46        | 0.29  | -0.53 | 0.20       | 0.55  | 0.40  | -0.61          | -0.47 | -0.21 | -0.61      | 0.48  | -0.30 | 0.31           | -0.41 | -0.31 | 0.52                  | 0.93  | 0.90  |
| 14      | 0.49                  | 0.60  | 0.08  | -0.27                       | -0.59 | -0.22 | -0.46                                 | -0.52 | -0.22 | -0.32        | -0.58 | 0.44  | -0.29      | 0.28  | -0.25 | 0.27           | 0.58  | -0.21 | -0.21      | 1.03  | -0.16 | -0.37          | -0.58 | 0.53  | 0.63                  | -0.04 | -0.34 |
| 15      | 1.09                  | 0.15  | -0.10 | -0.12                       | 1.07  | -0.57 | -1.54                                 | -1.55 | -0.46 | -0.39        | 0.22  | 0.03  | 0.38       | 0.51  | 0.37  | -1.05          | -0.38 | -0.74 | -0.67      | -0.03 | -0.49 | -0.53          | 0.27  | 0.06  | 1.63                  | 1.09  | 0.25  |
| 16      | 0.60                  | -0.23 | 0.12  | 0.59                        | -0.48 | -2.23 | 0.48                                  | 0.75  | 1.88  | 0.30         | 0.04  | 1.16  | 0.81       | 0.94  | 0.63  | 0.41           | -1.11 | -1.15 | 0.20       | 0.78  | 2.29  | 1.29           | -0.96 | -0.13 | 1.36                  | 0.39  | -0.76 |
| 17      | 0.00                  | -0.06 | -0.10 | -0.48                       | -0.03 | -0.06 | 0.32                                  | -0.03 | -0.03 | -0.54        | -0.03 | -0.04 | -0.07      | -0.04 | -0.03 | 0.32           | -0.06 | -0.13 | -0.12      | -0.03 | 0.00  | 0.06           | -0.03 | -0.11 | 0.40                  | -0.08 | -0.07 |
| 18      | -0.41                 | 0.49  | 0.27  | -0.84                       | -0.48 | -0.47 | 1.62                                  | -1.01 | -0.90 | 0.52         | 0.26  | 0.81  | -0.74      | -0.33 | -0.57 | 0.18           | -0.23 | -0.48 | 1.55       | -0.40 | -0.71 | 0.41           | 0.06  | 0.76  | -0.76                 | 0.61  | 0.17  |
| 19      | -0.15                 | -0.30 | -0.55 | 1.35                        | 0.59  | 0.30  | 0.28                                  | -0.01 | 1.36  | 0.25         | -0.51 | 0.20  | -0.13      | 1.74  | 1.75  | 0.54           | 0.09  | -0.85 | -0.56      | -0.50 | -0.32 | 0.45           | 1.03  | 0.83  | 1.04                  | -0.25 | 0.41  |
| 20      | -0.37                 | -0.03 | -0.06 | -0.25                       | 0.00  | -0.05 | 0.59                                  | 0.00  | -0.02 | -0.29        | 0.00  | -0.02 | 0.50       | -0.02 | -0.03 | -0.24          | -0.02 | -0.08 | -0.06      | 0.00  | 0.00  | 0.25           | 0.00  | -0.06 | -0.36                 | -0.04 | -0.07 |
| 21      | -0.55                 | -0.08 | -0.22 | 0.92                        | 0.00  | -0.12 | -0.48                                 | 0.00  | -0.08 | -0.87        | 0.00  | -0.09 | 0.83       | 0.00  | 0.00  | 0.21           | -0.06 | -0.30 | -0.27      | 0.00  | 0.00  | 0.11           | 0.00  | -0.28 | -0.06                 | -0.07 | -0.06 |
| 22      | 0.06                  | -0.16 | 0.04  | -1.16                       | -0.08 | -0.16 | 0.42                                  | -0.06 | -0.12 | -0.87        | -0.09 | -0.15 | -0.07      | -0.07 | -0.04 | 1.50           | -0.15 | 0.77  | -0.28      | -0.06 | -0.05 | 0.14           | -0.09 | 0.32  | -0.06                 | -0.15 | -0.12 |
| 23      | -0.52                 | -0.08 | -0.10 | 0.67                        | -0.05 | -0.07 | 0.43                                  | -0.06 | -0.06 | 0.53         | -0.05 | -0.06 | -0.64      | -0.08 | -0.07 | -0.38          | -0.07 | -0.10 | -0.10      | -0.06 | -0.01 | -0.63          | -0.05 | -0.11 | 1.09                  | -0.10 | -0.10 |
| 24      | -0.05                 | 0.07  | -0.80 | 0.40                        | 0.06  | 0.43  | -0.87                                 | -0.18 | 0.72  | -0.41        | -0.29 | -0.95 | 0.27       | 0.76  | 0.74  | -0.52          | 0.67  | 0.60  | -0.31      | 0.32  | -0.53 | 0.50           | 0.56  | -0.64 | -0.92                 | -0.38 | 0.94  |
| 25      | 0.78                  | 0.10  | -0.49 | 0.29                        | -0.23 | -0.30 | -0.80                                 | 0.88  | 0.54  | -0.16        | 0.46  | 0.16  | 0.30       | 0.13  | -0.21 | -0.58          | -0.12 | -0.45 | -0.52      | -0.93 | -0.20 | 0.40           | -0.31 | -0.48 | -0.41                 | 1.42  | 0.23  |
| 26      | 0.24                  | 0.64  | 0.10  | -0.31                       | -0.84 | -0.74 | 0.13                                  | 0.20  | 0.22  | -0.13        | 0.15  | -0.32 | -0.35      | -0.70 | -0.53 | 0.32           | 0.47  | 0.76  | -0.21      | 0.65  | -0.65 | 0.01           | -0.05 | 0.42  | -0.04                 | -0.28 | -0.33 |
| 27      | -0.43                 | -0.08 | -0.09 | -0.41                       | -0.10 | -0.38 | 0.94                                  | -0.24 | -0.17 | 0.13         | -0.11 | -0.10 | 0.38       | -0.07 | -0.12 | -0.35          | -0.25 | -0.29 | 1.26       | -0.08 | -0.16 | -0.55          | -0.17 | -0.16 | 0.22                  | -0.14 | -0.21 |
| 28      | -0.27                 | -0.16 | 0.25  | -0.31                       | 0.00  | 0.62  | 0.34                                  | -0.13 | -0.48 | -0.36        | -0.09 | 0.55  | 0.54       | -0.23 | -0.52 | -0.14          | -0.01 | -0.05 | -0.07      | -0.16 | -0.09 | -0.44          | -0.06 | 0.86  | 0.26                  | -0.14 | -0.45 |
| 29      | -0.29                 | -0.26 | -0.37 | -0.43                       | 1.33  | -0.25 | -0.05                                 | -0.05 | 0.60  | 0.07         | 0.69  | 0.22  | -0.45      | 0.07  | -0.22 | -0.98          | -0.15 | -0.30 | -0.38      | -0.98 | -0.21 | -0.57          | 0.96  | -0.31 | -0.11                 | 0.31  | 0.22  |
| 30      | 1.17                  | -0.10 | -0.25 | -1.36                       | -0.03 | -0.23 | 0.81                                  | -0.07 | -0.14 | 1.01         | -0.03 | -0.13 | -0.66      | -0.01 | -0.03 | -1.27          | -0.14 | -0.40 | 1.25       | -0.02 | -0.05 | -0.49          | -0.05 | -0.35 | 0.54                  | -0.10 | -0.10 |
| 31      | -0.25                 | 0.12  | -0.12 | 0.11                        | 0.18  | 0.00  | 0.39                                  | 0.50  | -0.04 | 0.04         | 0.18  | -0.14 | 0.05       | 0.21  | -0.13 | 0.47           | 0.36  | 0.00  | 0.24       | 0.27  | 0.00  | 0.11           | 0.21  | -0.11 | -0.05                 | 0.10  | -0.16 |
| 32      | -0.62                 | -0.68 | 0.76  | -0.17                       | -0.49 | 0.13  | 0.85                                  | -1.27 | 0.23  | -0.05        | -0.72 | 0.93  | -0.63      | -0.69 | -0.29 | 2.70           | -1.07 | 2.19  | -0.01      | -0.68 | -0.91 | 0.07           | -0.91 | 1.15  | 0.51                  | -0.76 | 0.71  |
| 33      | -0.67                 | 0.10  | 0.53  | 0.69                        | 0.00  | -0.91 | 0.07                                  | -0.50 | 0.09  | -0.51        | -0.38 | -0.11 | 0.49       | -0.23 | -0.24 | -0.29          | -0.01 | -0.07 | -0.23      | 0.63  | -0.35 | 0.52           | -0.25 | -0.05 | -0.39                 | -0.44 | 0.64  |
| 34      | -0.57                 | 2.19  | 1.46  | -0.66                       | -1.06 | -0.80 | 0.75                                  | -1.07 | -1.38 | -0.21        | 0.38  | -0.75 | 0.42       | 0.69  | 0.92  | -0.72          | -1.43 | -0.09 | -0.25      | 0.95  | 1.17  | -0.19          | 0.00  | 0.21  | 0.34                  | -0.21 | -0.98 |
| 35      | -0.89                 | -0.08 | -0.25 | 0.36                        | 0.00  | -0.13 | 0.27                                  | 0.00  | -0.09 | 0.80         | 0.00  | -0.10 | 0.61       | 0.00  | 0.00  | -1.24          | -0.07 | -0.33 | -0.30      | 0.00  | 0.00  | 0.42           | 0.00  | -0.32 | -0.25                 | -0.07 | -0.06 |
| 36      | -0.31                 | -0.09 | -0.19 | -0.14                       | -0.06 | -0.29 | 0.05                                  | -0.14 | -0.15 | -1.09        | -0.06 | -0.12 | 1.25       | -0.03 | -0.06 | -0.24          | -0.18 | -0.35 | 1.26       | -0.04 | -0.09 | 1.05           | -0.10 | -0.27 | -1.32                 | -0.12 | -0.14 |
| 37      | 1.10                  | -1.02 | -1.09 | -1.07                       | -0.74 | -1.00 | -0.19                                 | 1.95  | 1.30  | -0.51        | 1.06  | -0.69 | -0.32      | 0.02  | 0.70  | 0.34           | -0.57 | 0.00  | -0.61      | -0.31 | 0.77  | 1.19           | 1.15  | 1.10  | -0.90                 | -0.41 | -1.28 |
| 38      | 0.15                  | 0.20  | 0.32  | -0.55                       | 0.18  | 0.16  | -0.04                                 | 0.08  | 0.25  | 0.14         | 0.12  | 0.90  | -0.49      | 0.01  | -0.06 | -0.06          | 0.28  | 0.18  | -0.34      | -0.10 | -0.11 | -0.13          | 0.44  | 0.44  | -0.09                 | 0.12  | 0.34  |
| 39      | -0.29                 | -0.02 | -0.05 | -0.20                       | 0.00  | -0.04 | 0.35                                  | 0.00  | -0.01 | 0.54         | 0.00  | -0.02 | -0.36      | -0.02 | -0.04 | -0.19          | -0.01 | -0.07 | -0.05      | 0.00  | 0.00  | 0.52           | 0.00  | -0.05 | -0.28                 | -0.04 | -0.08 |

|    |       |       |       |       |       |       |       |       |       |       |       |       |       |       |       |       |       |       |       |       |       |       |       |       |       |       |       |
|----|-------|-------|-------|-------|-------|-------|-------|-------|-------|-------|-------|-------|-------|-------|-------|-------|-------|-------|-------|-------|-------|-------|-------|-------|-------|-------|-------|
| 40 | -0.41 | -0.38 | 0.17  | -0.75 | -0.64 | -0.67 | 0.75  | 0.59  | -0.53 | -0.38 | -0.38 | -0.76 | 0.11  | -0.14 | 0.89  | 0.01  | 0.67  | 0.77  | -0.27 | -0.44 | -0.55 | -0.02 | -0.15 | 1.08  | 0.35  | 0.55  | -0.05 |
| 41 | 0.45  | -0.37 | -0.04 | -0.24 | -0.50 | -0.07 | -0.41 | 1.20  | -0.03 | -0.20 | -0.43 | -0.03 | -0.27 | -0.12 | -0.07 | 0.50  | 0.49  | -0.05 | -0.24 | -0.47 | -0.02 | 0.42  | -0.43 | -0.03 | -0.36 | 0.84  | -0.11 |
| 42 | 0.37  | 0.18  | -0.09 | -0.32 | -0.53 | -0.47 | -0.52 | -0.43 | -0.36 | -0.56 | 0.99  | 0.21  | 0.20  | -0.44 | -0.33 | 0.45  | -0.15 | 0.25  | -0.16 | 1.19  | 1.79  | 0.76  | -0.65 | -0.57 | -0.61 | 0.26  | -0.59 |
| 43 | -0.24 | 0.63  | -0.04 | -0.23 | -0.61 | -0.23 | -0.42 | -0.51 | -0.17 | -0.30 | 0.20  | 0.47  | -0.24 | 0.53  | -0.19 | -0.52 | 0.34  | -0.27 | -0.20 | 0.53  | -0.19 | -0.35 | 0.06  | -0.27 | -0.42 | 0.69  | 0.40  |
| 44 | 0.40  | -0.26 | -0.04 | -0.22 | -0.35 | -0.09 | -0.35 | 0.77  | -0.04 | -0.20 | -0.30 | -0.03 | -0.28 | -0.35 | -0.06 | 0.60  | 0.63  | -0.07 | -0.20 | -0.33 | -0.03 | 0.41  | -0.31 | -0.04 | -0.32 | 0.53  | -0.11 |
| 45 | 0.13  | 0.05  | -0.12 | 0.11  | 0.14  | 0.34  | 0.09  | 0.16  | -0.17 | 0.10  | 0.08  | -0.22 | 0.16  | -0.06 | -0.12 | -0.03 | 0.31  | 0.13  | 0.25  | -0.01 | -0.02 | 0.06  | 0.22  | -0.09 | -0.02 | 0.06  | -0.01 |
| 46 | 0.00  | -0.21 | -0.47 | -1.01 | -0.13 | 1.41  | -0.47 | 0.19  | 0.03  | 0.26  | 0.18  | 0.45  | -1.07 | 0.21  | 0.78  | -0.26 | -0.18 | -0.25 | -0.25 | -0.81 | -0.57 | -1.25 | 0.18  | 0.46  | -0.17 | 0.22  | -0.07 |
| 47 | 0.17  | 0.07  | 0.19  | -1.06 | -0.21 | -0.74 | 0.91  | -0.47 | -0.37 | 0.41  | -0.21 | -0.22 | -0.01 | -0.10 | -0.19 | -0.13 | -0.10 | 0.06  | 1.22  | 0.64  | 1.32  | -0.78 | -0.34 | -0.38 | 0.41  | -0.26 | -0.34 |
| 48 | -0.52 | 0.87  | 0.07  | -0.15 | -0.08 | -0.79 | -0.22 | -0.62 | 0.01  | 1.05  | 0.98  | 0.52  | -1.24 | 0.73  | -0.05 | -1.31 | -0.49 | -0.12 | -0.64 | 1.45  | -0.35 | 0.03  | -0.65 | -0.79 | -1.12 | 0.80  | 0.58  |
| 49 | -0.62 | -0.57 | 0.00  | -0.05 | 0.29  | -0.09 | 0.39  | 0.66  | 0.07  | 0.72  | 0.45  | 0.27  | -0.36 | 0.91  | 0.95  | -1.05 | -0.82 | 0.01  | 1.30  | 1.96  | 2.19  | -0.24 | -0.39 | -0.57 | -0.80 | -0.33 | 0.12  |
| 50 | 0.35  | 0.22  | 0.24  | -0.83 | -0.43 | -1.05 | 0.41  | -0.23 | 0.21  | 0.55  | -0.11 | 0.21  | -0.31 | -0.26 | -0.40 | 0.02  | 0.40  | 0.43  | 1.20  | -0.29 | -0.59 | -0.45 | -0.66 | -0.65 | 0.15  | 0.67  | 0.80  |
